# Supplementary material for: Polysialic acid sustains cancer cell survival and migratory capacity in a hypoxic environment
Source: PubMed Central journal article supplement (PMC5017143; doi:10.1038/srep33026), 2016-09-09
Supplement: srep33026-s1.pdf [file srep33026-s1.pdf]

## Polysialic acid sustains cancer cell survival and migratory capacity in a hypoxic environment

Sara M. Elkashef,<sup>a</sup> Simon Allison,<sup>b</sup> Maria Sadiq,<sup>a</sup> Haneen Basheer,<sup>a</sup> Goreti Ribeiro Morais,<sup>a</sup> Paul M. Loadman,<sup>a</sup> Klaus Pors<sup>a</sup> and Robert A. Falconer<sup>a</sup>

<sup>a</sup> Institute of Cancer Therapeutics, Faculty of Life Sciences, University of Bradford, West Yorkshire BD7 1DP, U.K. Tel: +44 (0)1274 235842; Email: [r.a.falconer1@bradford.ac.uk](mailto:r.a.falconer1@bradford.ac.uk)

<sup>b</sup> Department of Pharmacy, School of Applied Sciences, University of Huddersfield, Huddersfield HD1 3DH, U.K.

### Supplementary data 1 (S1)

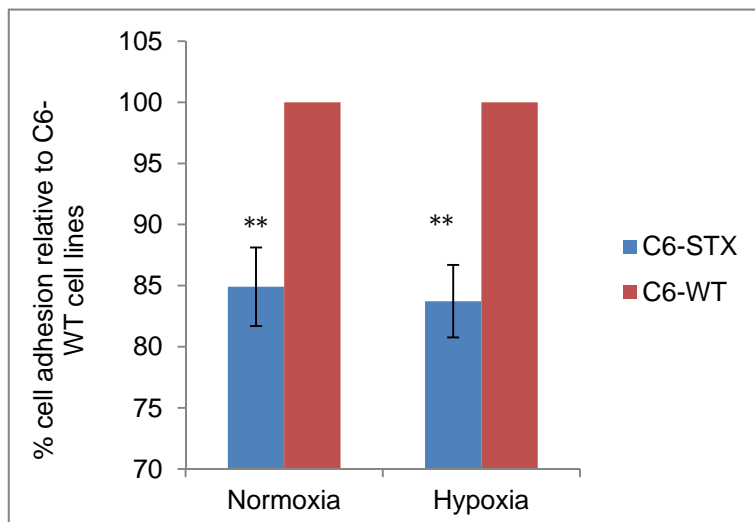

**S1. Effect of hypoxia on the polySia-mediated adhesiveness of cancer cells.** A polySia-mediated reduction in cell adhesion to Matrigel<sup>®</sup> in C6-STX but not C6-WT cell line was observed under both normoxia and hypoxia. (\*\*P≤0.01)

### Supplementary data 2 (S2)

| Cell line and conditions | Apoptotic cells           |                 | Viable cells |
|--------------------------|---------------------------|-----------------|--------------|
|                          | Late apoptotic (necrotic) | Early apoptotic |              |
| SH-SY5Y (Normoxia)       | 6.16 ± 0.15               | 10.36 ± 2.01    | 81.94 ± 2.19 |
| SH-SY5Y (Hypoxia)        | 4.41 ± 0.02               | 7.29 ± 0.29     | 85.54 ± 0.43 |

### S2. Percentage of annexin V staining of SH-SY5Y cells under hypoxic and normoxic conditions

### Supplementary data 3 (S3)

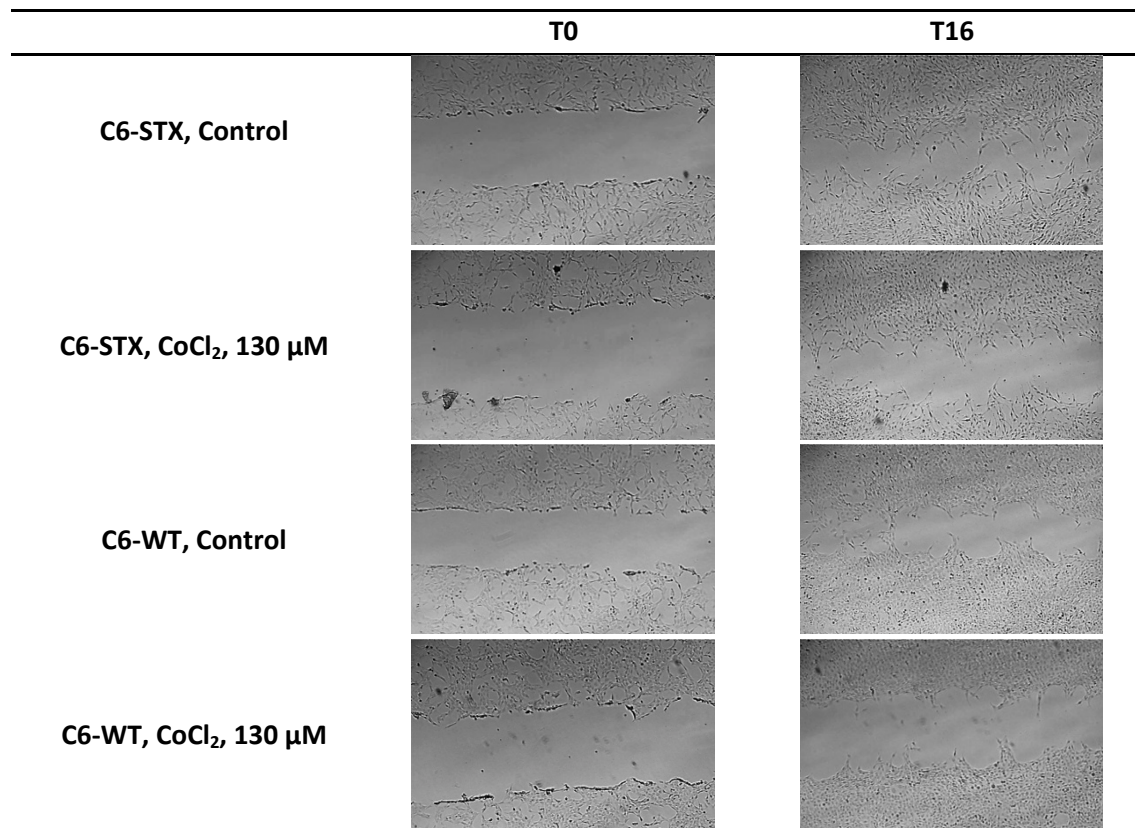

**S3. Migration of C6-STX and C6-WT cells following CoCl<sub>2</sub> treatment.** Wound size immediately and 16 hours after scratching illustrates wound closure of C6-STX and C6-WT cells with/without 100 μM CoCl<sub>2</sub>.

#### Supplementary data 4 (S4)

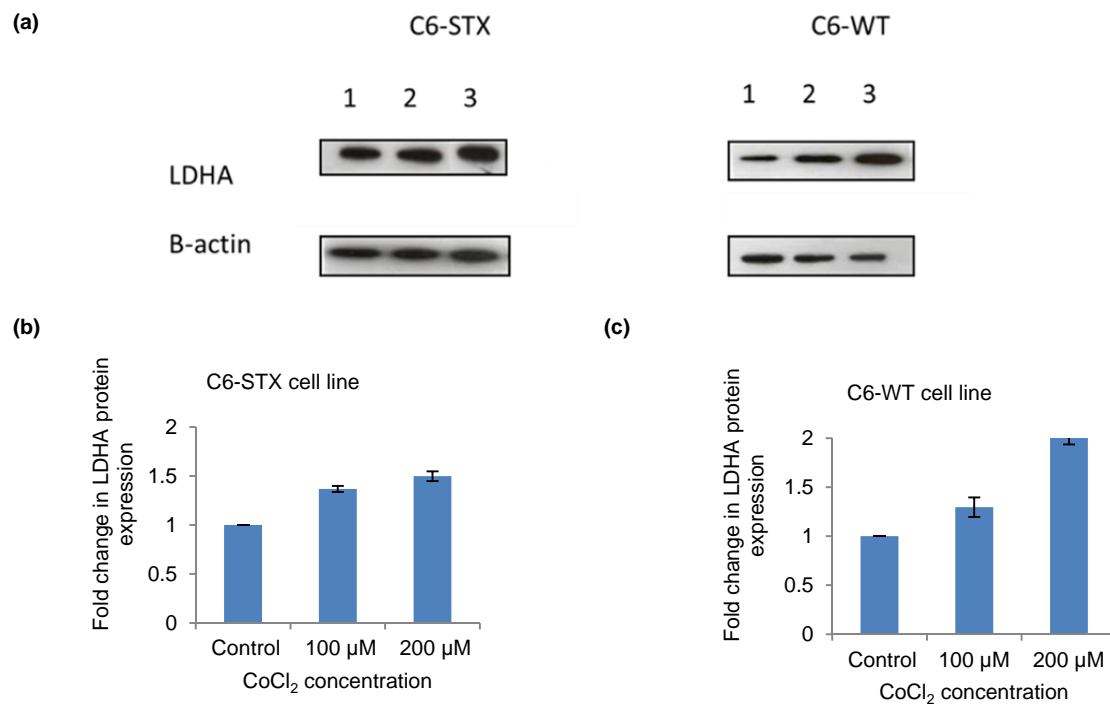

**S4. Effect of CoCl<sub>2</sub> treatment on C6 cell lines.** (A) Expression of LDHA after treatment of C6-STX and C6-WT cells with different concentrations of CoCl<sub>2</sub>. Lane 1 represents control untreated cells, lane 2 after 130 μM CoCl<sub>2</sub> and lane 3 after 200 μM CoCl<sub>2</sub>. Results are representative of two independent experiments; (B) quantification of fold-change in LDHA expression for C6-STX cells after treatment with 100 μM CoCl<sub>2</sub> (16 hours) and 200 μM CoCl<sub>2</sub> (24 hours); (C) quantification of fold-change in LDHA expression of C6-WT after treatment with 100 μM CoCl<sub>2</sub> (16 hours) and 200 μM CoCl<sub>2</sub> (24 hours).

**Supplementary data 5 (S5)**

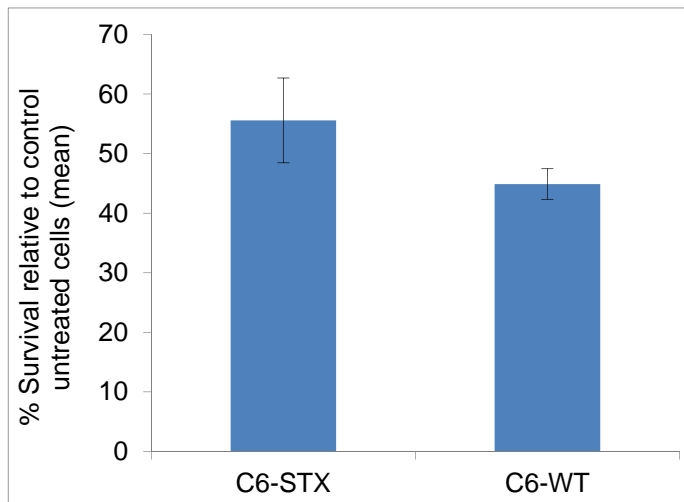

**S5. Effect of HIF-1 $\alpha$  induction on the survival of C6-STX and C6-WT cells. ( $P \geq 0.05$ , not significant)**
